# Supplementary material for: Synthesis and cell-surface binding of lectin-gold nanoparticle conjugates
Source: Royal Society of Chemistry journal article supplement (doi:10.1039/c1ay05151b), 2011-01-01
Supplement: c1ay05151b.pdf [file c1ay05151b.pdf]

**Electronic supplementary information (ESI)**  
**Synthesis and cell-surface binding of lectin-gold**  
**nanoparticle conjugates**

**Jine Wang,<sup>a,b</sup> Dianjun Liu<sup>a</sup> and Zhenxin Wang<sup>a,\*</sup>**

*<sup>a</sup> State Key Laboratory of Electroanalytical Chemistry, Changchun Institute of Applied Chemistry, Chinese Academy of Sciences, Changchun, 130022, China*

*<sup>b</sup> Graduate School of the Chinese Academy of Sciences, Beijing 100039, China*

- 1. Additional tables: table S1 and S2**
- 2. Synthesis of mPEG-SH stabilized gold nanoparticles**
- 3. Additional Figures S1-S5**

---

\*Corresponding author. Tel/Fax: (+86) 431-85262243. E-mail: wangzx@ciac.jl.cn.

## 1. Additional tables

**Table S1** Carbohydrate specificities of the lectins.

| Lectins                 | Abbreviation | Binding specificity <sup>a</sup>               | Name of lectin-GNP conjugates |
|-------------------------|--------------|------------------------------------------------|-------------------------------|
| Ricinus Communis        | RCA 120      | Gal $\beta$ (1,4)GlcNAc $\beta$ 1              | RCA@GNP                       |
| Agglutinin I            |              |                                                |                               |
| Concanavalin A          | Con A        | Branched and terminal mannose, terminal GlcNAc | Con A@GNP                     |
| Sambucus Nigra Lectin   | SNA          | $\alpha$ -2,6 sialic acid                      | SNA@GNP                       |
| Soybean Agglutinin      | SBA          | Terminal GalNAc                                | SBA@GNP                       |
| Maackia Amurensis       | MAA II       | $\alpha$ -2,3 sialic acid                      | MAA II@GNP                    |
| Lectin II               |              |                                                |                               |
| Griffonia simplicifolia | GS II        | Terminal GlcNAc                                | GS II@GNP                     |

<sup>a</sup> The binding specificity is obtained from manufacturer's introduction.

**Table S2** The properties of lectin-GNP conjugates.

| Lectin-GNP conjugates | Maximum absorption wavelength/nm | Diameter/nm<br>TEM <sup>a</sup> /DLS <sup>b</sup> | Total number of lectin molecules per particle <sup>c</sup> |
|-----------------------|----------------------------------|---------------------------------------------------|------------------------------------------------------------|
| citrate@GNP           | 518                              | 13.7±1.9/18.64±0.21                               | -                                                          |
| RCA@GNP               | 524                              | 14.7±2.2/48.31±0.12                               | 17                                                         |
| Con A@GNP             | 524                              | 14.3±1.8/32.39±0.50                               | 21                                                         |
| SNA@GNP               | 524                              | 14.3±2.2/25.91±1.0                                | 20                                                         |
| SBA@GNP               | 524                              | 14.3±1.8/33.78±0.79                               | 17                                                         |
| MAA II@GNP            | 524                              | 13.8±2.0/32.18±0.68                               | 19                                                         |
| GS II@GNP             | 524                              | 13.7±2.0/27.83±0.20                               | 17                                                         |

<sup>a</sup>The diameter of nanoparticle was measured by TEM; <sup>b</sup> The diameter of nanoparticle was measured by DLS; <sup>c</sup>and we found that the total number of lectin molecules per particle was about 20, that means single GNP may react with several glycosyl residues on cellular surface.

Total number of lectin molecules per particle was estimated by fluorescent method. Here, the fluorescent dye (FTIC or FC) conjugated lectins were used for synthesizing the lectin-GNP conjugates. After purified by centrifugation, and resuspended in water, a 150  $\mu$ L aliquot of the purified lectin-GNP conjugate solution (14.4 nM) was reacted with dithiothreitol (DTT, 150  $\mu$ L, 0.2 M in phosphate buffered saline (PBS), pH 7.5) in dark cabinet at room temperature for 12 h, respectively. In this step, all particle-bound lectins were released by a ligand exchange reaction with DTT, which

led to the precipitation of the particles <sup>S1,S2</sup>. Subsequently, the samples were stirred by ultrasound for 5 min, and centrifuged at 12 000 g for 30 min. The fluorescence intensity of the supernatant solution was measured by a spectrofluorometer. The concentration of particle-bound lectin was calculated by corresponding calibration curve from pure FITC/FC conjugated lectin.

## 2. Synthesis of mPEG-SH stabilized gold nanoparticles

The mPEG-SH stabilized GNPs were prepared as follows: 13 nm citrate stabilized GNPs were incubated with mPEG-SH at various molar ratios (GNP: mPEG-SH= 1:2000, 1:4000, 1:5000, 1:10000, 1:50000 and 1:100000, respectively) in 1.8 mM potassium carbonate for 1 h, respectively. Then, the particles were purified by repeated centrifugation (9600 g for 30 min, 3 times), and resuspended in water. Then the stabilities of mPEG-SH stabilized GNPs were tested by changing solution ionic strengths. The experimental result demonstrates that the mPEG-SH stabilized GNPs have good stabilities while the molar ratio of mPEG-SH to GNP is above 10000: 1 (see Fig. S1). Therefore, the molar ratio of 10000:1 (mPEG-SH : citrate stabilized GNP) was selected for synthesizing mPEG-SH stabilized GNPs (mPEG@GNPs). The interactions of mPEG@GNPs with cells were used as control experiments.

### 3. Additional Figures S1-S5

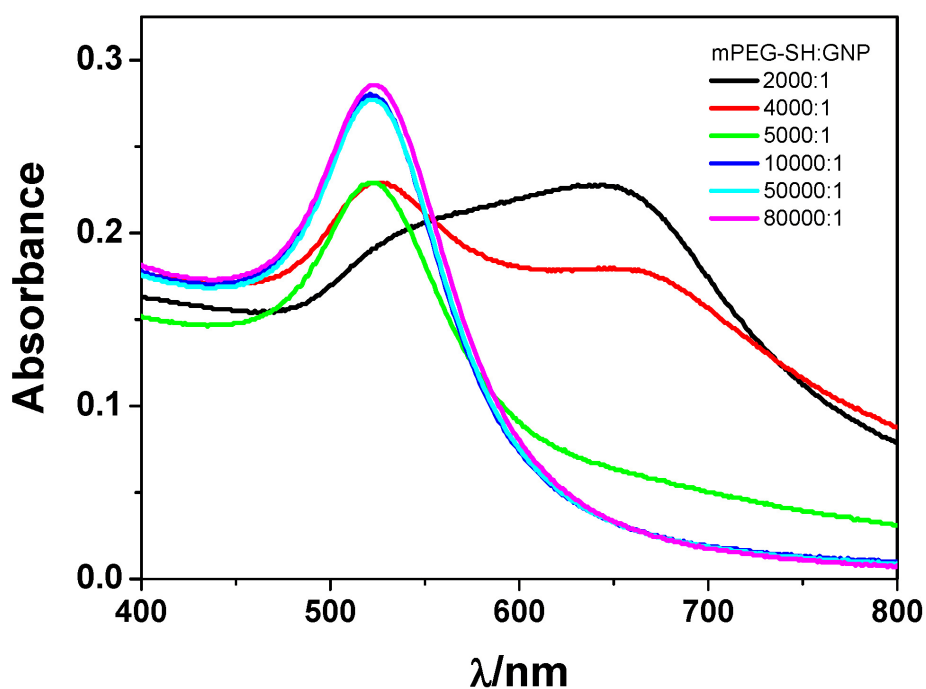

**Fig. S1** The UV-visible spectra of mPEG@GNPs (3.6 nM) in the presence of 0.5 M NaCl in the solution. The molar ratio of mPEG-SH to GNP is 2000:1, 4000: 1, 5000: 1, 10000: 1, 50000: 1 and 80000: 1 in the reaction mixture of mPEG@GNP synthesis, respectively.

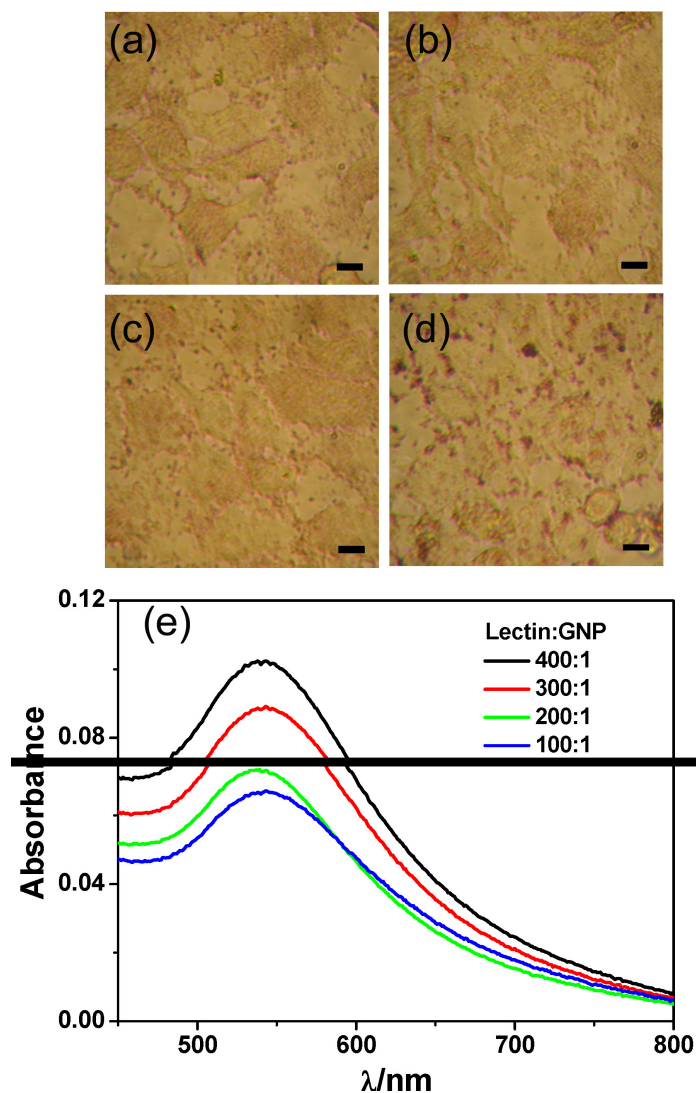

**Fig. S2** Bright-field microscopic images (a-d) and UV-visible spectra (e) of HeLa cells after incubated with 5.76 nM of Con A@GNP for 1 h at 37 °C, respectively. Scale bar: 10 μm for all images. The concentration of cells was  $7.5 \times 10^5$  cells/mL. The molar ratio of lectin to GNP is 100:1 (a), 200: 1 (b), 300: 1 (c), and 400: 1 (d) in the reaction mixture of Con A@GNP synthesis, respectively. The molar ratios of lectin to NHS-PEG-S-S-PEG-NHS (2:1), and mPEG-SH to GNP (10000: 1) are fixed in the reaction mixture of Con A@GNP synthesis. The concentration of GNP is 6 nM in the reaction mixture of Con A@GNP synthesis.

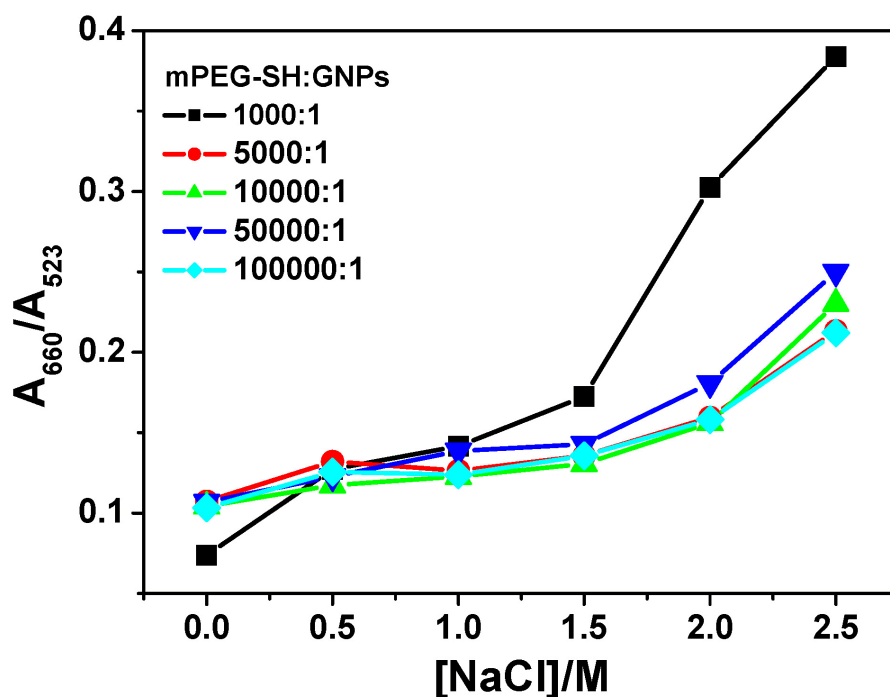

**Fig. S3** The effect on stability of Con A@GNP by changing solution ionic strength. The molar ratio of mPEG-SH to GNP is 1000:1, 5000: 1, 10000: 1, 50000: 1, and 100000: 1 in the reaction mixture of Con A@GNP synthesis, respectively. The molar ratios of lectin to NHS-PEG-S-S-PEG-NHS (2:1), and lectin to GNP (300: 1) are fixed in the reaction mixture of Con A@GNP synthesis. The concentration of GNP is 6 nM in the reaction mixture of Con A@GNP synthesis.

The monodispersing GNP has maximum SPR absorption band at 523 nm, and the GNP aggregate has maximum SPR absorption band at 660 nm. Therefore, the increasing  $A_{660}/A_{523}$  value means that the stability of Con A@GNP is decreased, *i.e.* the Con A@GNP forms aggregates in the solution.<sup>S3,S4</sup>



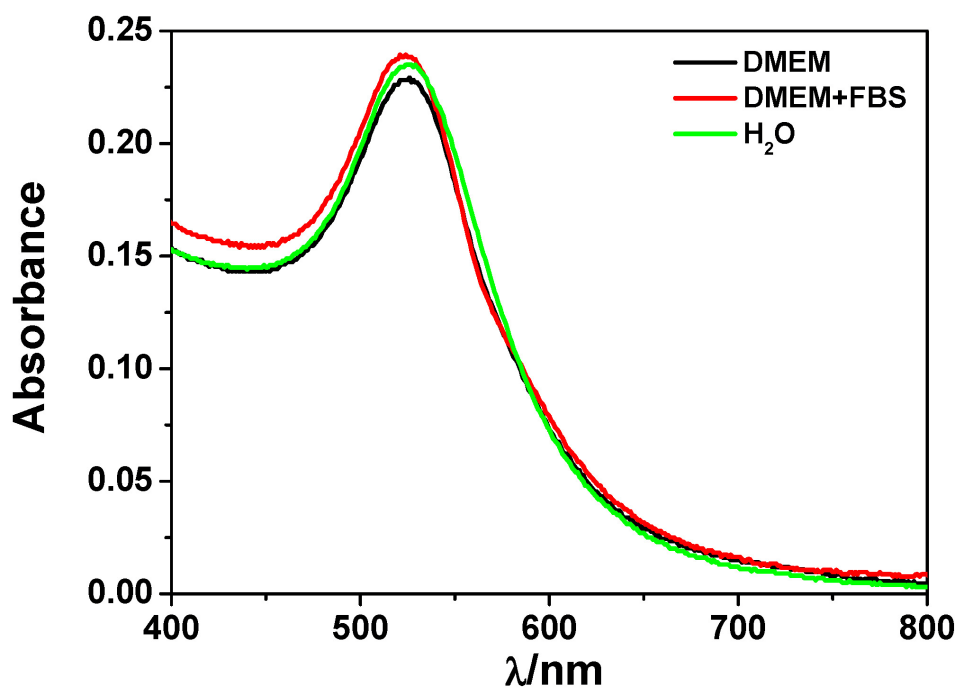

**Fig. S4** UV-visible spectra of Con A@GNP dissolved in DMEM, cell culture medium (DMEM+10% FBS) and water. The concentration of Con A@GNP is 3.6 nM.

Here, no significant changes of spectra were observed.

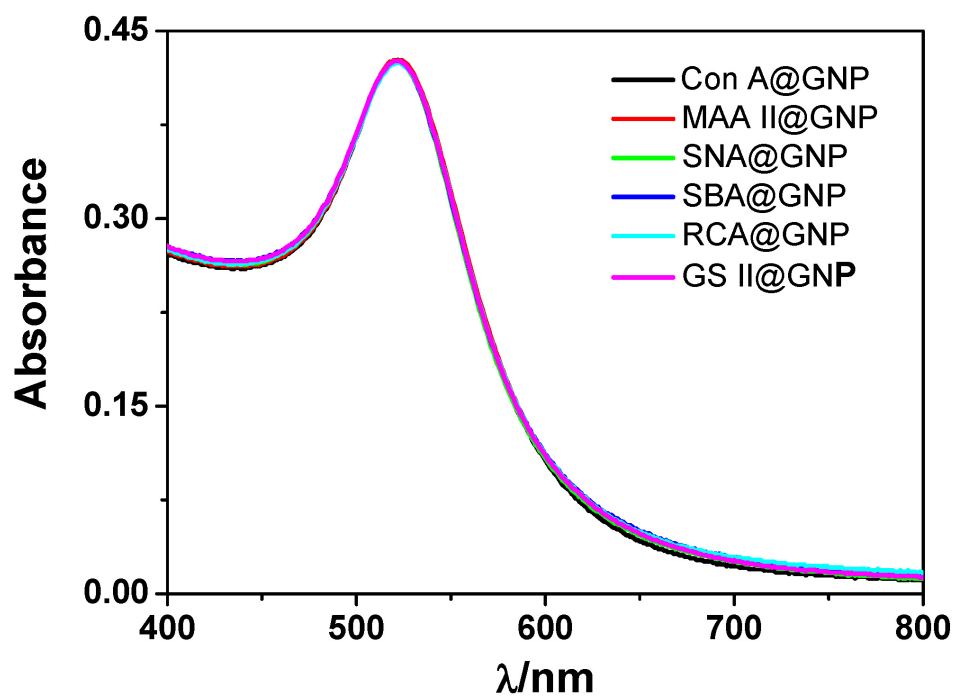

**Fig. S5** UV-visible spectra of the six lectin-GNP conjugates. The concentration of the lectin-GNP conjugates is 4.0 nM.

## References

- S1 S. J. Hurst, A. K. R. Lytton-Jean and C. A. Mirkin, *Anal. Chem.*, 2006, **78**, 8313-8318.
- S2 L. Maus, J. P. Spatz and R. Fiammengo, *Langmuir*, 2009, **25**, 7910-7917.
- S3 U. Kreibig and L. Genzel, *Surf. Sci.*, 1985, **156**, 678-700.
- S4 J. J. Storhoff, A. A. Lazarides, R. C. Mucic, C. A. Mirkin, R. L. Letsinger and G. C. Schatz, *J. Am. Chem. Soc.*, 2000, **122**, 4640-4650.
